# Supplementary material for: Epigenomic characterization of a p53-regulated 3p22.2 tumor suppressor that inhibits STAT3 phosphorylation via protein docking and is frequently methylated in esophageal and other carcinomas
Source: PubMed Central journal article supplement — Theranostics. 2018 Jan 1;8(1):61–77. doi: 10.7150/thno.20893 (PMC5743460; doi:10.7150/thno.20893), 2018-01-01

**Suppl. Table 1.** Relationship of *DLEC1* methylation and clinicopathological parameters of esophageal cancer patients from TCGA cohort

| Clinicopathological features   | Esophageal cancer cohort (TCGA) |             |             |                      |
|--------------------------------|---------------------------------|-------------|-------------|----------------------|
|                                | Number (n=185)                  | methyated   | unmethyated | p-values             |
| <b><u>Age</u></b>              |                                 |             |             |                      |
| ≤50                            | 28                              | 27 (96.4%)  | 1 (3.60%)   | <b><u>≤0.001</u></b> |
| >50<65                         | 80                              | 72 (90.0%)  | 8 (10.0%)   |                      |
| ≥65                            | 77                              | 66 (85.7%)  | 11 (14.3%)  |                      |
| <b><u>Gender</u></b>           |                                 |             |             |                      |
| Female                         | 27                              | 26 (96.3%)  | 1 (3.70%)   | 0.68                 |
| Male                           | 158                             | 139 (88.0%) | 19 (12.0%)  |                      |
| <b><u>Histologic grade</u></b> |                                 |             |             |                      |
| g1                             | 19                              | 18 (94.7%)  | 1 (5.30%)   | <b><u>0.03</u></b>   |
| g2                             | 77                              | 71 (92.2%)  | 6 (7.80%)   |                      |
| g3                             | 49                              | 41 (83.7%)  | 8 (16.3%)   |                      |
| gx                             | 40                              | 35 (87.5%)  | 5 (12.5%)   |                      |
| <b><u>Pathologic stage</u></b> |                                 |             |             |                      |
| Stage i                        | 19                              | 15 (78.9%)  | 4 (21.1%)   | <b><u>0.001</u></b>  |
| Stage ii                       | 79                              | 76 (96.2%)  | 3 (3.80%)   |                      |
| Stage iii                      | 56                              | 49 (87.5%)  | 7 (12.5%)   |                      |
| Stage iv                       | 9                               | 9 (100%)    | 0           |                      |
| <b><u>Pathologic m</u></b>     |                                 |             |             |                      |
| 0                              | 136                             | 125 (91.9%) | 11 (8.10%)  | 0.42                 |
| 1                              | 9                               | 9 (100%)    | 0           |                      |
| <b><u>Pathologic n</u></b>     |                                 |             |             |                      |
| 0                              | 77                              | 73 (94.8%)  | 4 (5.20%)   | 0.39                 |
| 1                              | 69                              | 59 (85.5%)  | 10 (14.5%)  |                      |
| 2                              | 12                              | 12 (100%)   | 0           |                      |
| 3                              | 8                               | 7 (87.5%)   | 1 (12.5%)   |                      |
| <b><u>Pathologic t</u></b>     |                                 |             |             |                      |
| 0                              | 1                               | 1 (100%)    | 0           | 0.3                  |
| 1                              | 31                              | 25 (80.6%)  | 6 (19.4%)   |                      |
| 2                              | 43                              | 42 (97.7%)  | 1 (2.30%)   |                      |
| 3                              | 88                              | 80 (90.9%)  | 8 (9.10%)   |                      |
| 4                              | 5                               | 5 (100%)    | 0           |                      |

**Suppl. Table 2.** Relationship of *DLEC1* expression and clinicopathological parameters of lung adenocarcinoma patients from TCGA cohort

| Clinicopathological features   | Number (n=576) | High expression | Low expression | p-values                |
|--------------------------------|----------------|-----------------|----------------|-------------------------|
| <b><u>Age</u></b>              |                |                 |                |                         |
| ≤50                            | 41             | 12 (29.3%)      | 23 (56.1%)     | <b><u>0.02</u></b>      |
| >50<65                         | 201            | 74 (36.8%)      | 83 (41.3%)     |                         |
| ≥65                            | 296            | 130 (43.9%)     | 109 (36.8%)    |                         |
| <b><u>Gender</u></b>           |                |                 |                |                         |
| Female                         | 311            | 135 (43.4%)     | 108 (34.7%)    | <b><u>0.008</u></b>     |
| Male                           | 265            | 95 (35.8%)      | 122 (46.0%)    |                         |
| <b><u>Residual tumor</u></b>   |                |                 |                |                         |
| r0                             | 371            | 150 (40.4%)     | 150 (40.4%)    | <b><u>0.046</u></b>     |
| r1                             | 15             | 4 (26.7%)       | 7 (46.7%)      |                         |
| r2                             | 4              | 2 (50.0%)       | 2 (50.0%)      |                         |
| rx                             | 27             | 16 (59.3%)      | 4 (14.8%)      |                         |
| <b><u>Pathologic stage</u></b> |                |                 |                |                         |
| Stage i                        | 307            | 136 (44.3%)     | 105 (34.2%)    | <b><u>&lt;0.001</u></b> |
| Stage ii                       | 135            | 48 (35.6%)      | 60 (44.4%)     |                         |
| Stage iii                      | 97             | 33 (34.0%)      | 45 (46.4%)     |                         |
| Stage iv                       | 28             | 10 (35.7%)      | 17 (60.7%)     |                         |
| <b><u>Pathologic m</u></b>     |                |                 |                |                         |
| 0                              | 387            | 149 (38.5%)     | 161 (41.6%)    | 0.09                    |
| 1                              | 27             | 9 (33.3%)       | 17 (63.0%)     |                         |
| <b><u>Pathologic n</u></b>     |                |                 |                |                         |
| 0                              | 363            | 154 (42.4%)     | 136 (37.5%)    | <b><u>0.03</u></b>      |
| 1                              | 108            | 38 (35.2%)      | 49 (45.4%)     |                         |
| 2                              | 87             | 29 (33.3%)      | 43 (49.4%)     |                         |
| 3                              | 2              | 0               | 0              |                         |
| <b><u>Pathologic t</u></b>     |                |                 |                |                         |
| 0                              | 0              | 0               | 0              | <b><u>&lt;0.001</u></b> |
| 1                              | 189            | 92 (48.7%)      | 57 (30.2%)     |                         |
| 2                              | 315            | 109 (34.6%)     | 144 (45.7%)    |                         |
| 3                              | 49             | 18 (36.7%)      | 19 (38.8%)     |                         |
| 4                              | 20             | 9 (45.0%)       | 9 (45.0%)      |                         |

**Suppl. Table 3.** Methylation status of 3p21-22 TSGs (with genome positions) in ESCC

|                                                 | <b>Sample</b>  | <b><i>PLCD1</i> (~38.00 Mb)</b> | <b><i>DLEC1</i> (~38.03 Mb)</b> | <b><i>RASSF1A</i> (~50.32 Mb)</b> | <b><i>ZMYND10</i> (~50.34 Mb)</b> |
|-------------------------------------------------|----------------|---------------------------------|---------------------------------|-----------------------------------|-----------------------------------|
| <b>ESCC cell lines</b>                          | NE1            | u                               | u                               | u                                 | u                                 |
|                                                 | NE3            | u                               | u                               | u                                 | u                                 |
|                                                 | EC1            | u                               | m                               | m+u                               | u                                 |
|                                                 | EC18           | u                               | m                               | m+u                               | u                                 |
|                                                 | EC109          | u                               | m                               | m+u                               | m                                 |
|                                                 | HKESC1         | u                               | u                               | m+u                               | m+u                               |
|                                                 | HKESC2         | u                               | u                               | m+u                               | m+u                               |
|                                                 | HKESC3         | m                               | m                               | u                                 | m+u                               |
|                                                 | SLMT1          | u                               | m                               | u                                 | u                                 |
|                                                 | KYSE30         | m                               | m                               | m                                 | m+(u)                             |
|                                                 | KYSE70         | m+u                             | (m)                             | m+(u)                             | m+u                               |
|                                                 | KYSE140        | u                               | m                               | u                                 | m+(u)                             |
|                                                 | KYSE150        | m                               | m                               | u                                 | m+(u)                             |
|                                                 | KYSE180        | (m)+u                           | m                               | u                                 | u                                 |
|                                                 | KYSE270        | u                               | m                               | m                                 | u                                 |
|                                                 | KYSE410        | m+u                             | u                               | m+u                               | m+u                               |
|                                                 | KYSE450        | u                               | m                               | m+u                               | m+u                               |
|                                                 | KYSE510        | m+(u)                           | m                               | m+u                               | m+u                               |
|                                                 | KYSE520        | u                               | m                               | u                                 | u                                 |
|                                                 | <b>Total</b>   | m: 7/17 (41%)                   | m: 14/17 (82%)                  | m: 11/17 (65%)                    | m: 11/17 (65%)                    |
| <b>ESCC primary tumors (Chinese) (Cohort I)</b> | ESCa1T         | u                               | m                               | u                                 | u                                 |
|                                                 | ESCa2T         | u                               | u                               | u                                 | u                                 |
|                                                 | ESCa3T         | u                               | m                               | u                                 | m                                 |
|                                                 | ESCa4T         | u                               | m                               | u                                 | (m)+u                             |
|                                                 | ESCa5T         | u                               | m                               | u                                 | u                                 |
|                                                 | ESCa6T         | m                               | m                               | u                                 | m                                 |
|                                                 | ESCa7T         | u                               | u                               | u                                 | u                                 |
|                                                 | ESCa8T         | m                               | m                               | u                                 | m                                 |
|                                                 | ESCa9T         | u                               | m                               | u                                 | u                                 |
|                                                 | <b>ESCa10T</b> | u                               | m                               | m                                 | u                                 |
|                                                 | ESCa11T        | u                               | m                               | u                                 | u                                 |
|                                                 | ESCa12T        | u                               | u                               | u                                 | u                                 |
|                                                 | ESCa13T        | u                               | m                               | u                                 | u                                 |
|                                                 | ESCa14T        | u                               | u                               | u                                 | u                                 |
|                                                 | ESCa15T        | u                               | m                               | u                                 | (m)+u                             |
|                                                 | ESCa16T        | u                               | u                               | u                                 | (m)+u                             |
|                                                 | ESCa17T        | u                               | u                               | u                                 | m                                 |
|                                                 | ESCa18T        | u                               | u                               | u                                 | u                                 |
|                                                 | ESCa19T        | u                               | m                               | u                                 | u                                 |
|                                                 | <b>ESCa20T</b> | u                               | u                               | u                                 | m                                 |
|                                                 | ESCa21T        | u                               | m                               | u                                 | u                                 |
|                                                 | ESCa22T        | u                               | u                               | u                                 | m                                 |
|                                                 | ESCa23T        | u                               | u                               | u                                 | u                                 |
|                                                 | ESCa24T        | m                               | m                               | m                                 | m                                 |
|                                                 | ESCa25T        | u                               | m                               | u                                 | u                                 |
|                                                 | ESCa26T        | u                               | m                               | m                                 | u                                 |
|                                                 | ESCa27T        | m                               | u                               | u                                 | u                                 |
|                                                 | ESCa28T        | u                               | m                               | u                                 | u                                 |
|                                                 | ESCa29T        | u                               | m                               | (u)                               | u                                 |
|                                                 | <b>ESCa30T</b> | m                               | m                               | m                                 | m                                 |
|                                                 | ESCa31T        | u                               | m                               | u                                 | u                                 |
|                                                 | ESCa32T        | u                               | u                               | m                                 | m                                 |
|                                                 | ESCa33T        | u                               | m                               | m                                 | u                                 |
|                                                 | ESCa34T        | u                               | m                               | (m)+u                             | u                                 |
|                                                 | ESCa35T        | u                               | m                               | u                                 |                                   |
|                                                 | <b>Total</b>   | m: 5/35 (14%)                   | m: 22/35 (66%)                  | m: 7/35 (20%)                     | m: 12/34 (35%)                    |

**Suppl. Table 4.** Primers used in this study

| PCR                  | Gene or fragment | Primer         | Sequence (5' → 3')        | Location | Product size (bp) |
|----------------------|------------------|----------------|---------------------------|----------|-------------------|
| RT-PCR               | <i>DLEC1</i>     | <i>DLEC1A</i>  | ttcctccctcgctactc         | Exon 1   | 309               |
|                      |                  | <i>DLEC1B</i>  | aaactcatccagccgctg        | Exon 2   |                   |
| Alternative splicing | <i>DLEC1</i>     | <i>DLEC1y1</i> | caaagaagccagcaccgata      | Exon 5   | 422               |
|                      |                  | <i>DLEC1y2</i> | gcagtaaccacagtccaaca      | Exon 9   |                   |
|                      |                  | <i>DLEC1N</i>  | ccgggacatgctatattagt      | Exon 10  | 541               |
|                      |                  | <i>DLEC1G</i>  | aggctctgggacttcctc        | Exon 13  |                   |
| Deletion             | <i>DLEC1</i>     | <i>DLEC1A</i>  | ttcctccctcgctactc         | Exon 1   | 385               |
|                      |                  | <i>DLEC1C</i>  | caactgcagccccagatc        | Intron 1 |                   |
| Cloning              | Promoter         | <i>DLEC1F1</i> | tgcctcttgctctcctg         | Promoter | 1046 (F1/R)       |
|                      |                  | <i>DLEC1F2</i> | tcagcaatcagcacagacc       | Promoter |                   |
|                      |                  | <i>DLEC1R</i>  | aaccgagacgccgctaac        | Exon 1   | 313 (F2/R)        |
|                      | ORF              | Fragment I     | gccgccaccatggagaccagggc   | Exon 1   | ~1.1 (kb)         |
|                      |                  |                | gtgaaaaacccaattggtgg      | Exon 6   |                   |
|                      |                  | Fragment II    | agtgtttctagctaagccac      | Exon 6   | ~1.2 (kb)         |
|                      |                  |                | gagggcatatggctctaag       | Exon 14  |                   |
|                      |                  | Fragment III   | cttagagccatatgccctc       | Exon 14  | ~1.4 (kb)         |
|                      |                  |                | gccatgtgcactgggatg        | Exon 25  |                   |
|                      |                  | Fragment IV    | catcccagtcacatggc         | Exon 25  | ~1.6 (kb)         |
|                      |                  |                | gctcgagcggagcctcaggg      | Exon 36  |                   |
| ChIP assay           | <i>DLEC1</i>     | <i>DLEC1S</i>  | cttgctcaccggcgtctt        | Exon 1   | 241 (s/c)         |
|                      |                  | <i>DLEC1C</i>  | caactgcagccccagatc        | Intron 1 |                   |
|                      |                  | <i>DLEC1B</i>  | aaactcatccagccgctg        | Exon 2   | 166 (s/b)         |
|                      |                  | <i>DLEC1A</i>  | ttcctccctcgctactc         | Exon 1   |                   |
|                      |                  | <i>DLEC1R2</i> | aagacgccggtgagcaag        | Exon 1   | 162               |
|                      | <i>ACTIN</i>     | <i>ACTINPP</i> | ctgtgttgccgtacaggtc       | Exon     | 181               |
| MSP                  | <i>DLEC1</i>     | <i>ACTININ</i> | gtggagactgtctcccgg        | Intron   |                   |
|                      |                  | <i>m1</i>      | gttcgtagttcggtttcgtc      | Exon 1   | 107               |
|                      |                  | <i>m2</i>      | cgaatatcttaaatacgaacg     | Exon 1   |                   |
|                      |                  | <i>u1</i>      | tagttttgtagtttggtttgtt    | Exon 1   | 110               |
|                      |                  | <i>u2</i>      | acaaaatatcttaaatacacaaca  | Exon 1   |                   |
| BGS                  | <i>DLEC1</i>     | <i>BGS1</i>    | gaagatataaatgtttataatgatt | Promoter | 597               |
|                      |                  | <i>BGS4</i>    | aactacaaccccaaatacctaa    | Intron 1 |                   |

## **Supplementary material and methods**

### **Array-CGH (aCGH)**

Whole-genome arrays (1-Mb resolution) and aCGH was performed and analyzed as previously [1]. Hybridized slides were scanned and analyzed with the GenePixPro 4.0 image analysis software.

### **Semi-quantitative RT-PCR and quantitative RT-PCR analysis**

RNA was reverse-transcribed using MuLV reverse transcriptase (GeneAmp RNA PCR kit, Applied Biosystems). RT-PCR was performed as described previously using *GAPDH* as a control [2]. Primers used were listed in Suppl. Table 4.

### **Multiplex differential DNA-PCR**

Multiplex differential genomic DNA-PCR was performed using primer pair *DLEC1A/C* for 35 cycles (annealing temperature 58 °C) with AmpliTaq Gold, using 0.1 ug of DNA per 12.5 ul PCR reaction [3]. *GAPDH* and *DLEC1* were employed to detect *DLEC1* deletion in a region spanning exon 1 and intron 1.

### **Promoter activity assay**

Different regions of the *DLEC1* promoter were cloned by PCR from normal human placenta DNA (sigma-Aldrich, USA). PCR was carried out with a high-fidelity Platinum Pfx DNA polymerase (Life Technologies, USA) with 10% DMSO. The sequences and orientations of the cloned fragments were confirmed by sequencing. The longest and shorter fragments were amplified from primer pairs *DLEC1F1-R* and *DLEC1F2-R* respectively (Suppl. Table 4). Restriction enzyme Bst XI was employed to digest the longest fragment to produce an intermediate one. These fragments were then linked to pGL2-Enhancer Vector (Promega) to generate p(-295)*DLEC1*EN, p(-685)*DLEC1*EN and p(-1021)*DLEC1*EN. Promoter activities of these fragments were assessed by transient transfection in CNE1 and CNE2 cell lines using Transfast (Promega).

### **Analysis of alternative splicing**

*DLEC1y1*, *DLEC1y2*, *DLEC1N* and *DLEC1G* (Suppl. Table 4) were used to generate different splicing fragments. Desired PCR products were purified using QIAex II (Qiagen). Purified PCR amplicons were sequenced and aligned with *DLEC1* mRNA sequence using the “bl2seq” program ([www.ncbi.nlm.nih.gov/blast](http://www.ncbi.nlm.nih.gov/blast)).

### **Chromatin immunoprecipitation (ChIP) assay**

ChIP assay was performed as described previously. Primers used were listed in Suppl. Table 4. Antibody to acetylated histone H4 (Upstate Biotechnology) was used to precipitate cross-linked chromatin. *ACTIN* was employed as a control for normalization of each PCR product.

### **Online analysis of TCGA data sets**

Clinical, mRNA expression and genome-wide DNA methylation data of 185 esophageal cancer, 585 lung adenocarcinoma and 504 lung squamous cell carcinoma patients was obtained from public databases of The Cancer Genome Atlas (TCGA). Raw datasets were downloaded from TCGA Data Portal (<http://gdac.broadinstitute.org/>) and analyzed. “Level 3” methylation data (Illumina Infinium Human DNA Methylation 450 platform) was retrieved from Johns Hopkins University and University of Southern California. mRNAseq expression data (level 3, normalized gene expression data, Illumina HiSeq 2000 platform) was retrieved from University of North Carolina or Canada's Michael Smith Genome Sciences Centre. Genomic mutation data (Illumina Genome Analyzer platform) was retrieved from Washington University School of Medicine Proteomics (for esophageal cancer) and Broad Institute of MIT and Harvard (for lung cancer) and analyzed.

### **Wound-healing assay**

Cell motility was assessed using a scratch wound-healing assay. Cells transiently transfected with DLEC1 were cultured in 6-well plates until confluent. A single scratch was produced in the cell layer using a sterile tip. After incubation for 24 and 48 hours, cells were photographed under a phase contrast microscope. The experiments were performed in triplicates.

### **Immunofluorescence**

Cells grown on coverslips were stained by indirect immunofluorescence as described previously [2, 4]. Briefly, cells were incubated with primary antibodies against DLEC1, E-cadherin, or Vimentin and then incubated with Alexa Fluor 594-conjugated secondary antibody against mouse IgG (A11062) (Invitrogen Molecular Probes, Carlsbad, CA), or FITC-conjugated secondary antibody against rabbit IgG (F0205) (DAKO, Denmark). To analyze the effects of DLEC1 on actin stress fiber formation, cells were serum starved for 24 h before incubation in medium-containing 5% fetal bovine serum. After 1 h, cells were fixed and stained by Rhodamine-labeled phalloidin (Invitrogen Molecular Probes). Cells were then counterstained with DAPI

and imaged with an Olympus BX51 microscope (Olympus Corporation, Tokyo, Japan).

### **Dual-luciferase reporter assay**

The promoter activities were determined by luciferase reporter assays. Luciferase reporters of several key signaling pathways, including NF- $\kappa$ B-luc, AP-1-luc, SRE-luc, STATs-bs-luc, TopFlash-luc, and PAI-luc were used to examine signaling pathway regulated by DLEC1. Cells were transiently co-transfected with DLEC1 expression vector and phRL-TK (the luciferase reporters). *DLEC1*-promoter luciferase reporters were co-transfected with expression vector encoding wild-type p53. After 48 h, cells were lysed and luciferase activities were measured using Dual-Luciferase® Reporter Assay System (Promega, Madison, WI). To normalize transfection efficiency, phRL-TK luciferase activities were measured as an internal control. At least three independent experiments were performed, with each repeated in triplicates.

## **Supplementary figure legends**

**Suppl. figure 1.** (A) *DLEC1* resides at 3p21-22, a locus with hemizygous deletion detected by 1-Mb array-CGH in ESCC cell lines. (B) The abundance of *DLEC1* gene copies relative to GAPDH was determined by multiplex differential genomic DNA-PCR in ESCC cell lines, with homozygous deletion of *DLEC1* detected in one. NE1, NE3 and normal PBMCs were used as normal controls. The position of *DLEC1* primers used for deletion examination is shown. ESCC, esophageal squamous cell carcinoma.

**Suppl. figure 2.** Alterations of *DLEC1* DNA copy numbers in ESCC and lung carcinomas, analyzed through Oncomine database. ESCC, esophageal squamous cell; Ca, carcinoma; SCLC, squamous cell lung carcinoma; Lung adeno, lung adenocarcinoma.

**Suppl. figure 3.** Profiling of *DLEC1* mutations in esophageal and other carcinomas. Mutation profile was analyzed using TCGA dataset. No mutation was detected in ESCC. ESCC, esophageal squamous cell; ESAD, esophageal adenocarcinoma; Lung adeno, lung adenocarcinoma; LSCC, lung squamous cell carcinoma; NSCLC, non-small cell lung cancer; SCLC, squamous cell lung carcinoma; NPC, nasopharyngeal carcinoma.

**Suppl. figure 4.** Defining the functional *DLEC1* promoter. (A) Diagram of *DLEC1* promoter and its CpG island. CpG sites are numbered according to the order marked in BGS, with MSP primer sites and BGS region indicated. Potential binding sites for p53, c-Myb, HSF, E2F and Sp1 are labeled. (B) Luciferase activity assay of different promoter constructs in carcinoma cell lines. Luc, luciferase gene; enh, enhancer. The shortest fragment (+18 to -295, located in the CGI) could function as a core promoter to drive gene expression. (C) Promoter activities after co-transfection of different promoter constructs with p53 plasmids. Wild-type p53 upregulated *DLEC1* promoter activity. (D-E) Box plot graphs for the distribution of *DLEC1* methylation and expression levels in esophageal and lung cancer patients from TCGA database.

**Suppl. figure 5.** Promoter methylation and loss of expression of *DLEC1* in NPC. (A) *DLEC1* is methylated and repressed in NPC cell lines. M: methylated; U: unmethylated. (B) Expression of *DLEC1* was restored or increased by 5-aza-dC (Aza) treatment in NPC cells, along with increased unmethylated promoter alleles. (C) Detailed BGS analysis of *DLEC1* methylation in representative NPC cell lines and primary tumors. NPx: normal nasopharynx.

**Suppl. figure 6.** Regulation of *DLEC1* expression by histone H4 acetylation. (A) Locations of primers used in ChIP assay in the *DLEC1* CGI. (B) TSA-treated Lung carcinoma cell line H1299 showed moderately induced *DLEC1* expression and concomitantly increased acetylation of histone H4 at the endogenous *DLEC1* CGI; while the transfected carcinoma cells showed high level of *DLEC1* expression but no increment of H4 acetylation at the endogenous *DLEC1* CGI at all.

**Suppl. figure 7** Analysis of *DLEC1* alternative splicings. (A) Detailed diagrams of splicing forms. (B) Different splicings of *DLEC1* were detected in multiple cell lines, normal adult and fetal tissues, as well as PBMCs.

**Suppl. figure 8** (A) Representative colony formation assay of *DLEC1*-transfected carcinoma cells. *DLEC1* expression was measured by Western blot. (B) Wound-healing assay of carcinoma cells transfected with either vector or *DLEC1*. Pictures were taken at 0, 24 or 36 h. Right panel: width of remaining open wound measured in relation to time 0 h separation.

## References:

1. Ying J, Li H, Seng TJ, Langford C, Srivastava G, Tsao SW, et al. Functional epigenetics identifies a protocadherin PCDH10 as a candidate tumor suppressor for nasopharyngeal, esophageal and multiple other carcinomas with frequent methylation. *Oncogene*. 2006; 25: 1070-80.
2. Li L, Ying J, Tong X, Zhong L, Su X, Xiang T, et al. Epigenetic identification of receptor tyrosine kinase-like orphan receptor 2 as a functional tumor suppressor inhibiting beta-catenin and AKT signaling but frequently methylated in common carcinomas. *Cell Mol Life Sci*. 2014; 71: 2179-92.
3. Qiu GH, Tan LK, Loh KS, Lim CY, Srivastava G, Tsai ST, et al. The candidate tumor suppressor gene BLU, located at the commonly deleted region 3p21.3, is an E2F-regulated, stress-responsive gene and inactivated by both epigenetic and genetic mechanisms in nasopharyngeal carcinoma. *Oncogene*. 2004; 23: 4793-806.
4. Hu XT, Zhang FB, Fan YC, Shu XS, Wong AH, Zhou W, et al. Phospholipase C delta 1 is a novel 3p22.3 tumor suppressor involved in cytoskeleton organization, with its epigenetic silencing correlated with high-stage gastric cancer. *Oncogene*. 2009; 28: 2466-75.

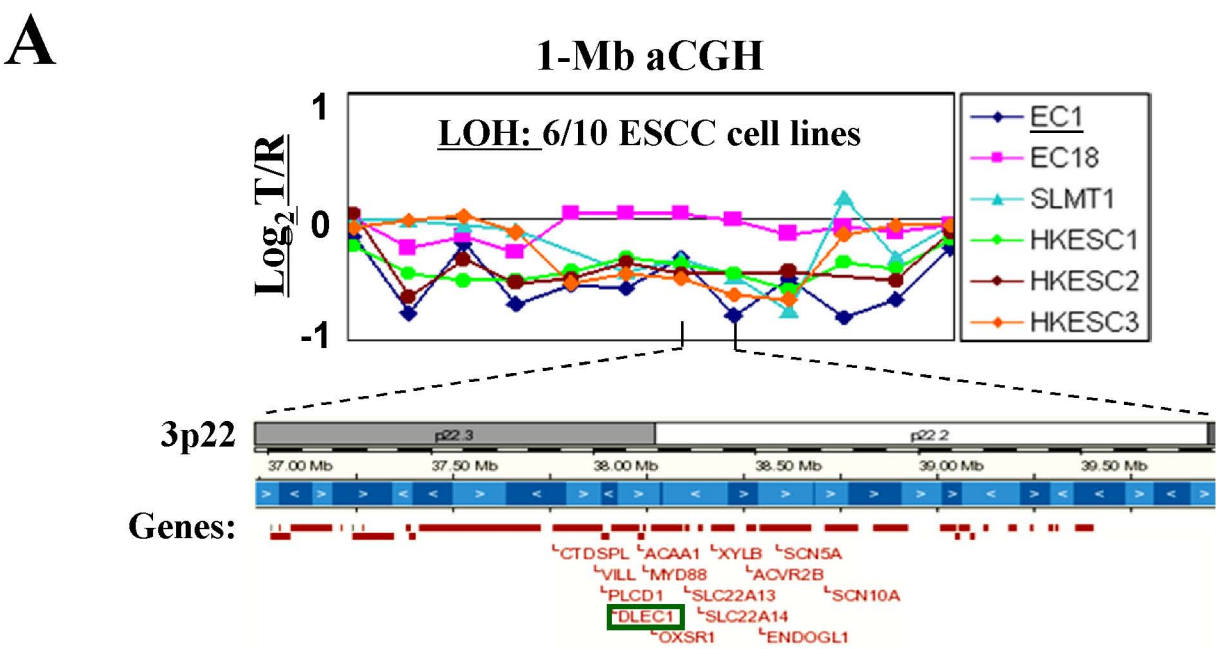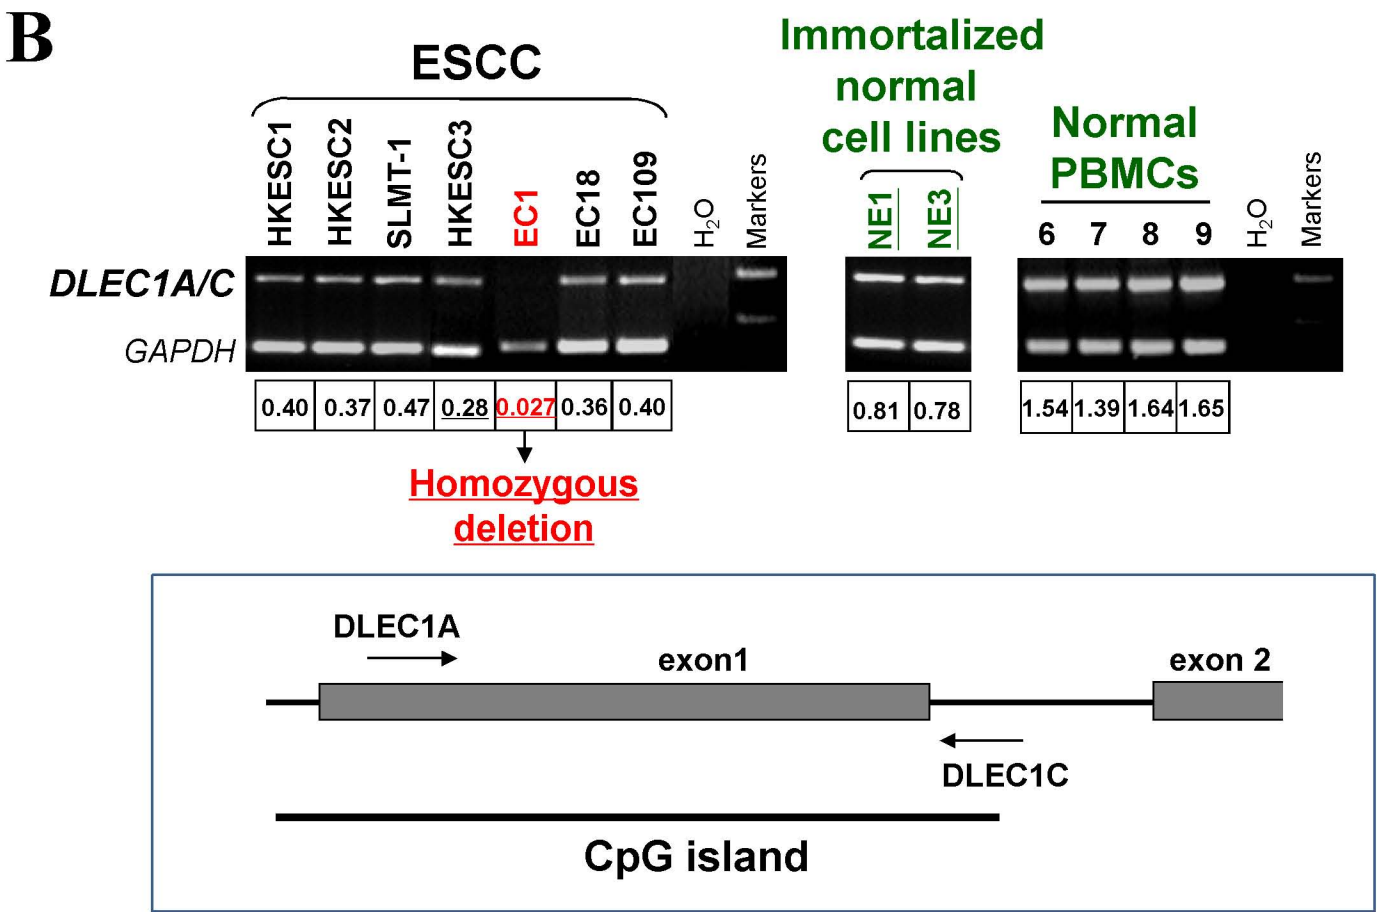

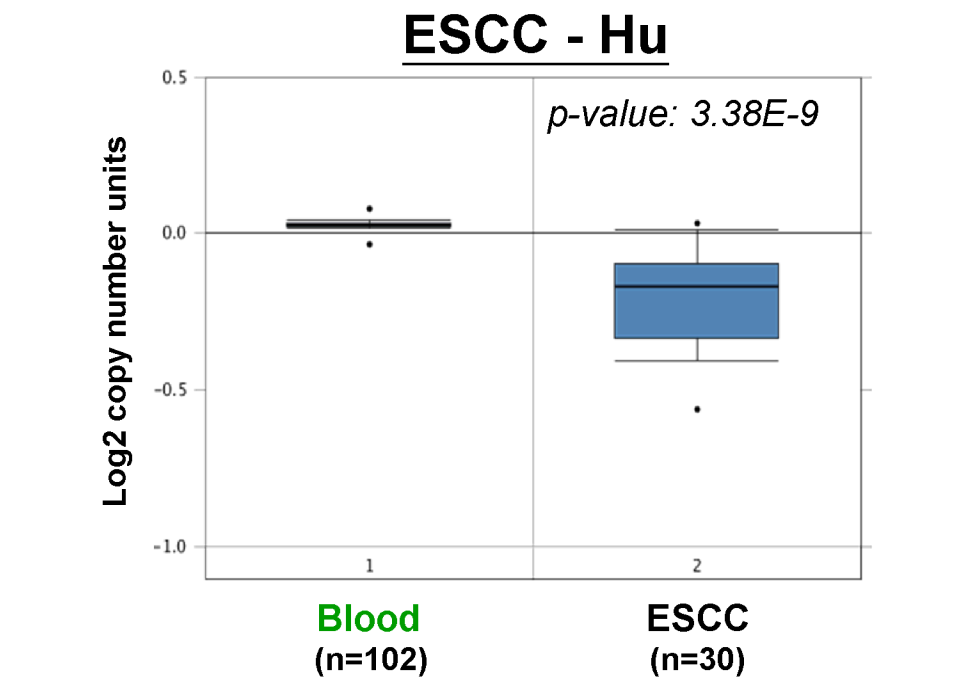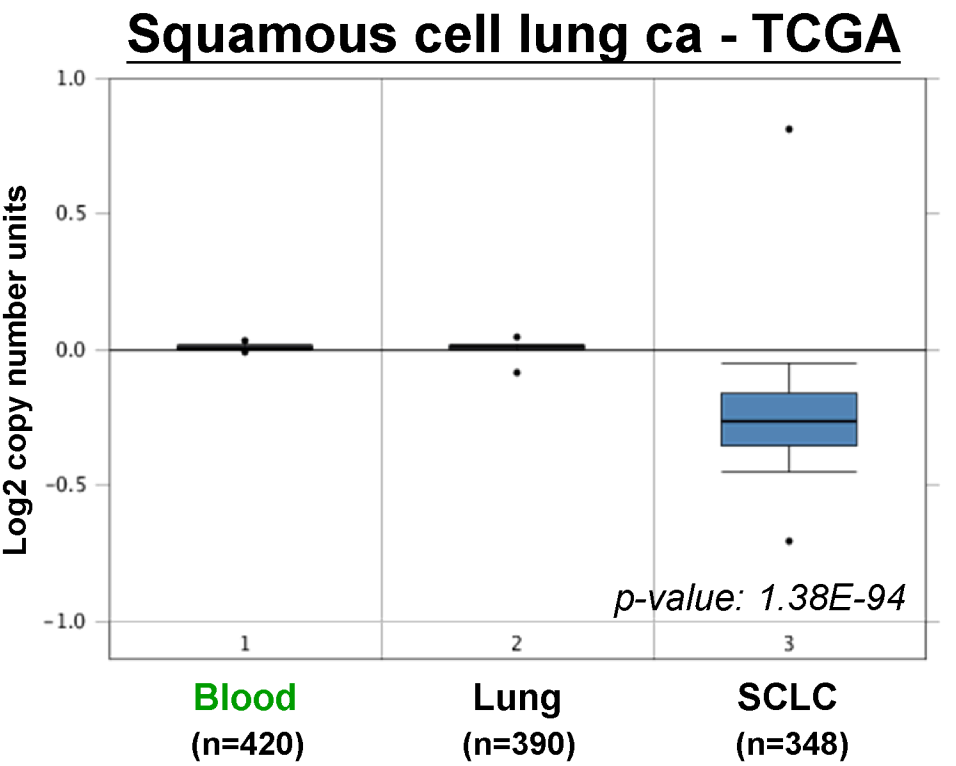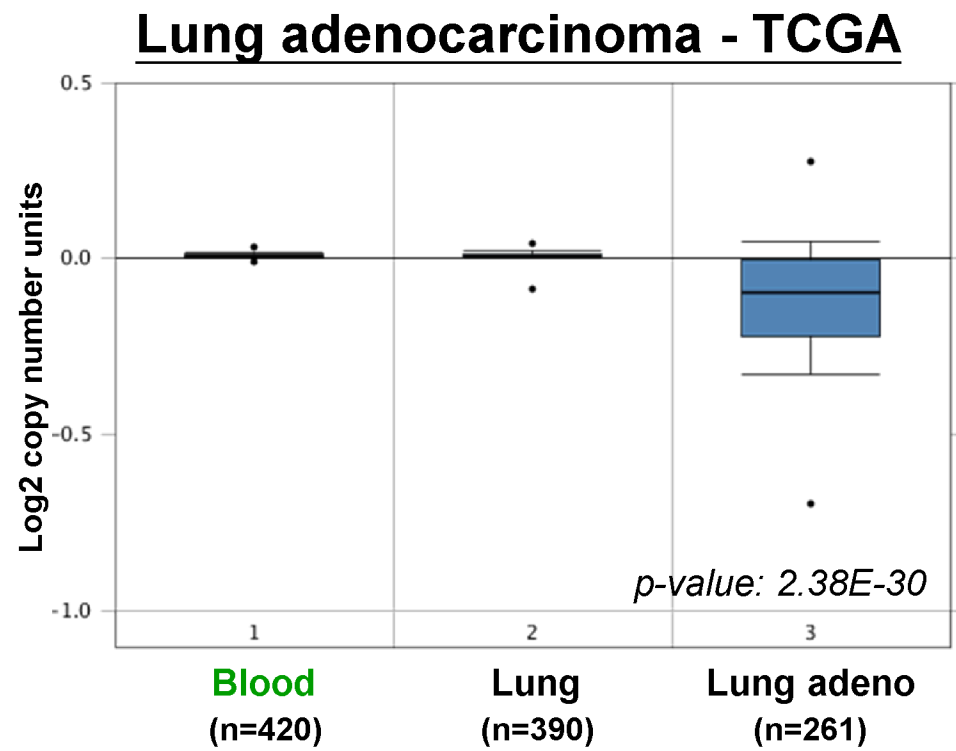

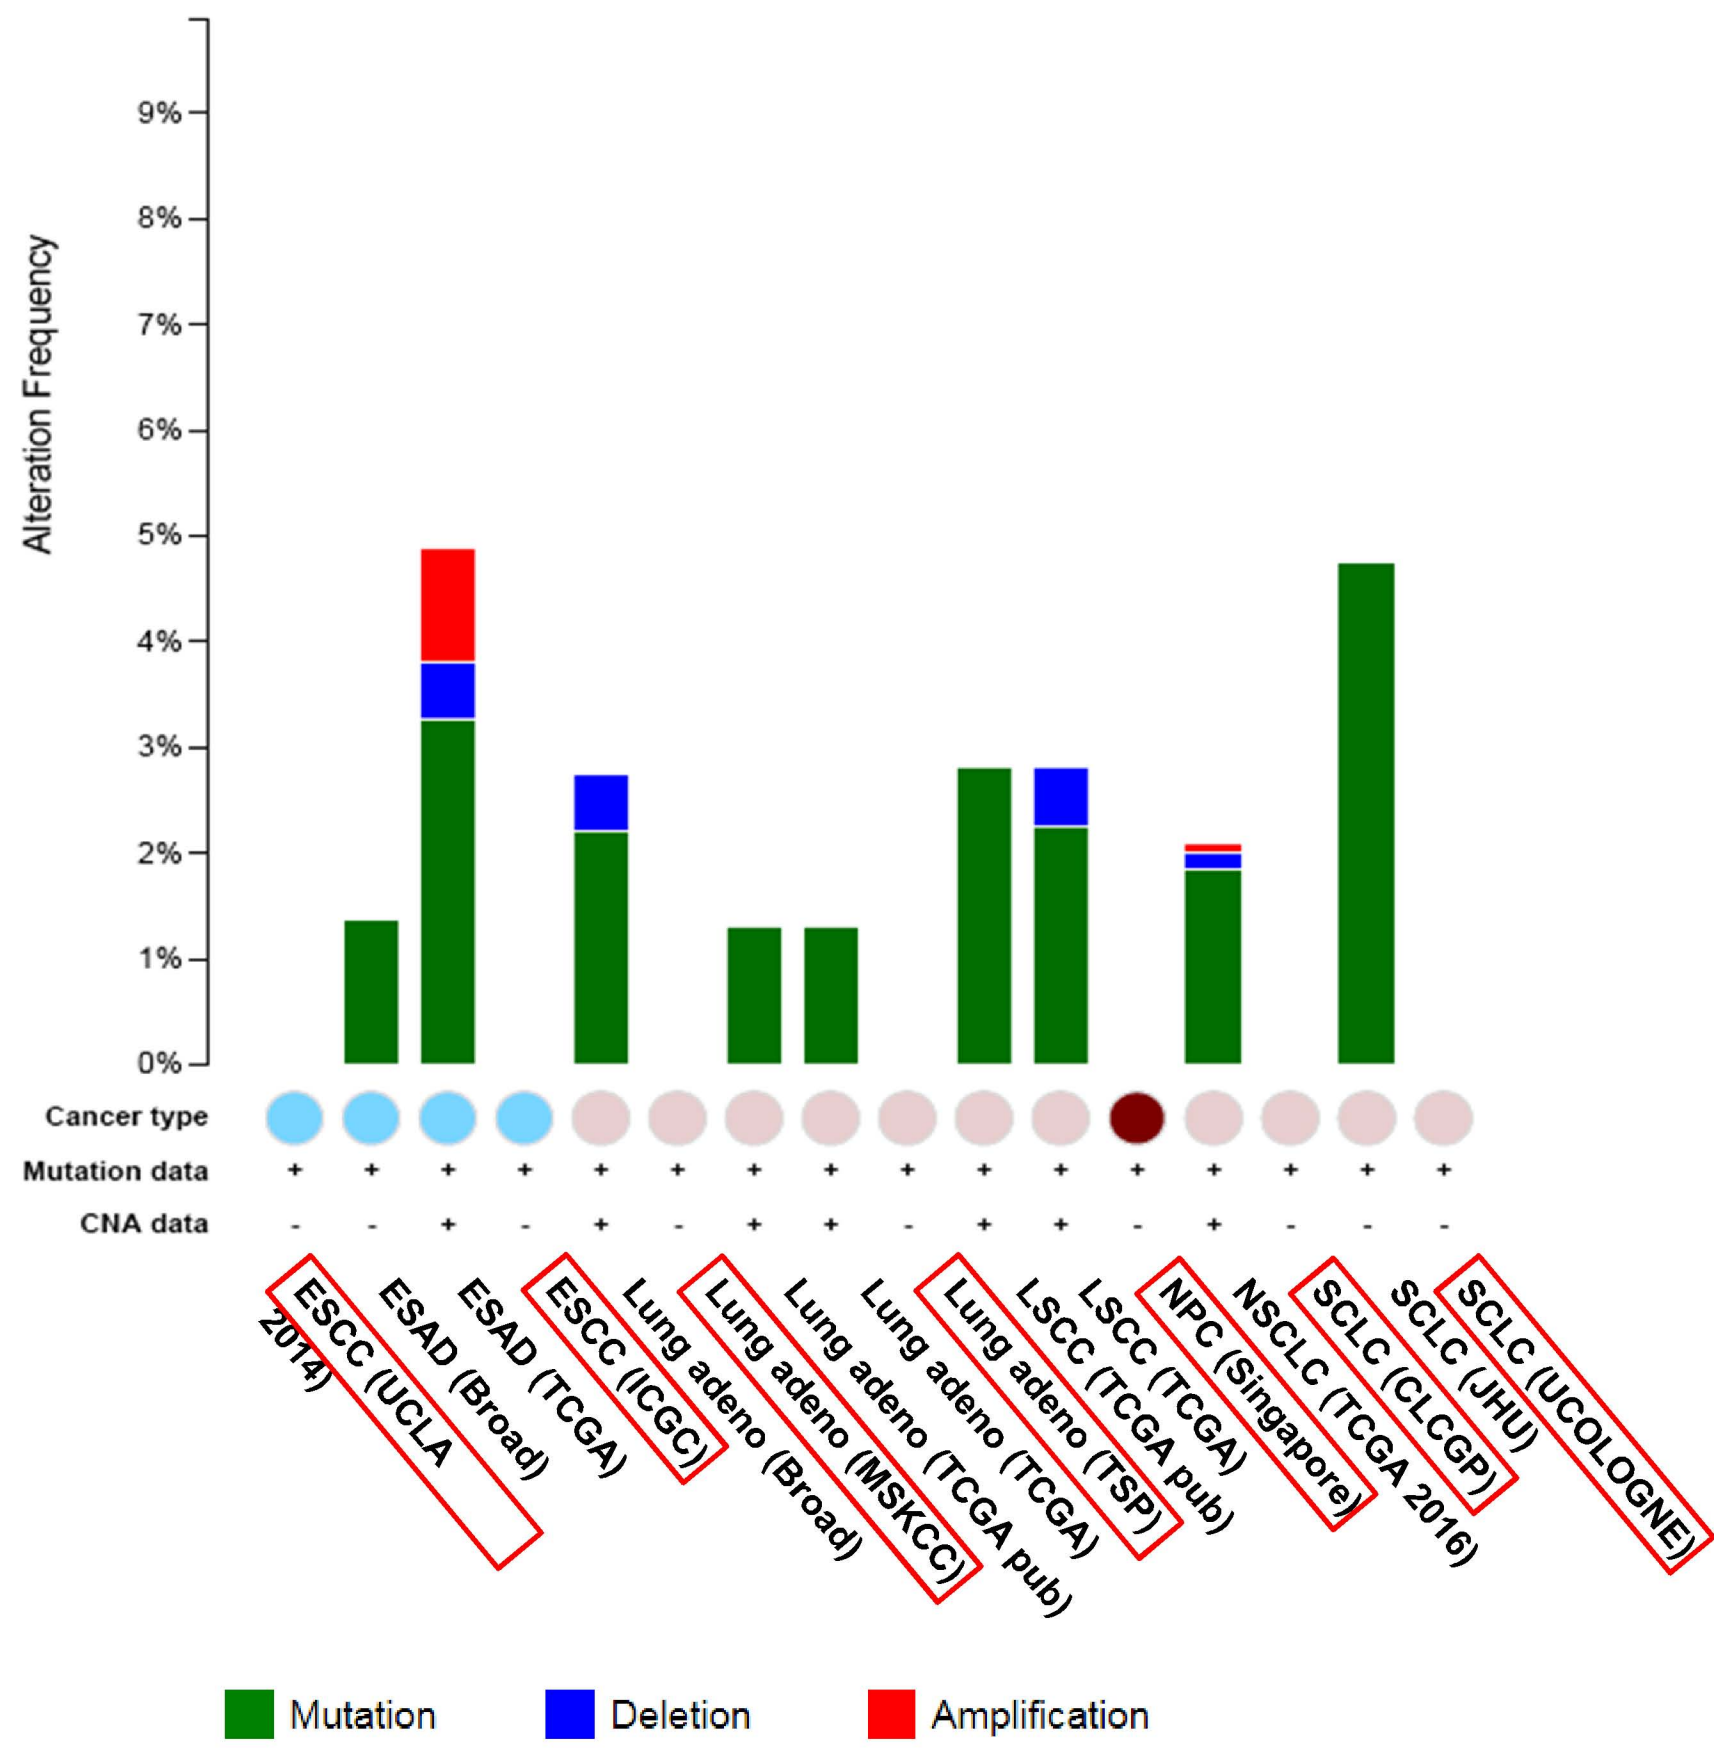

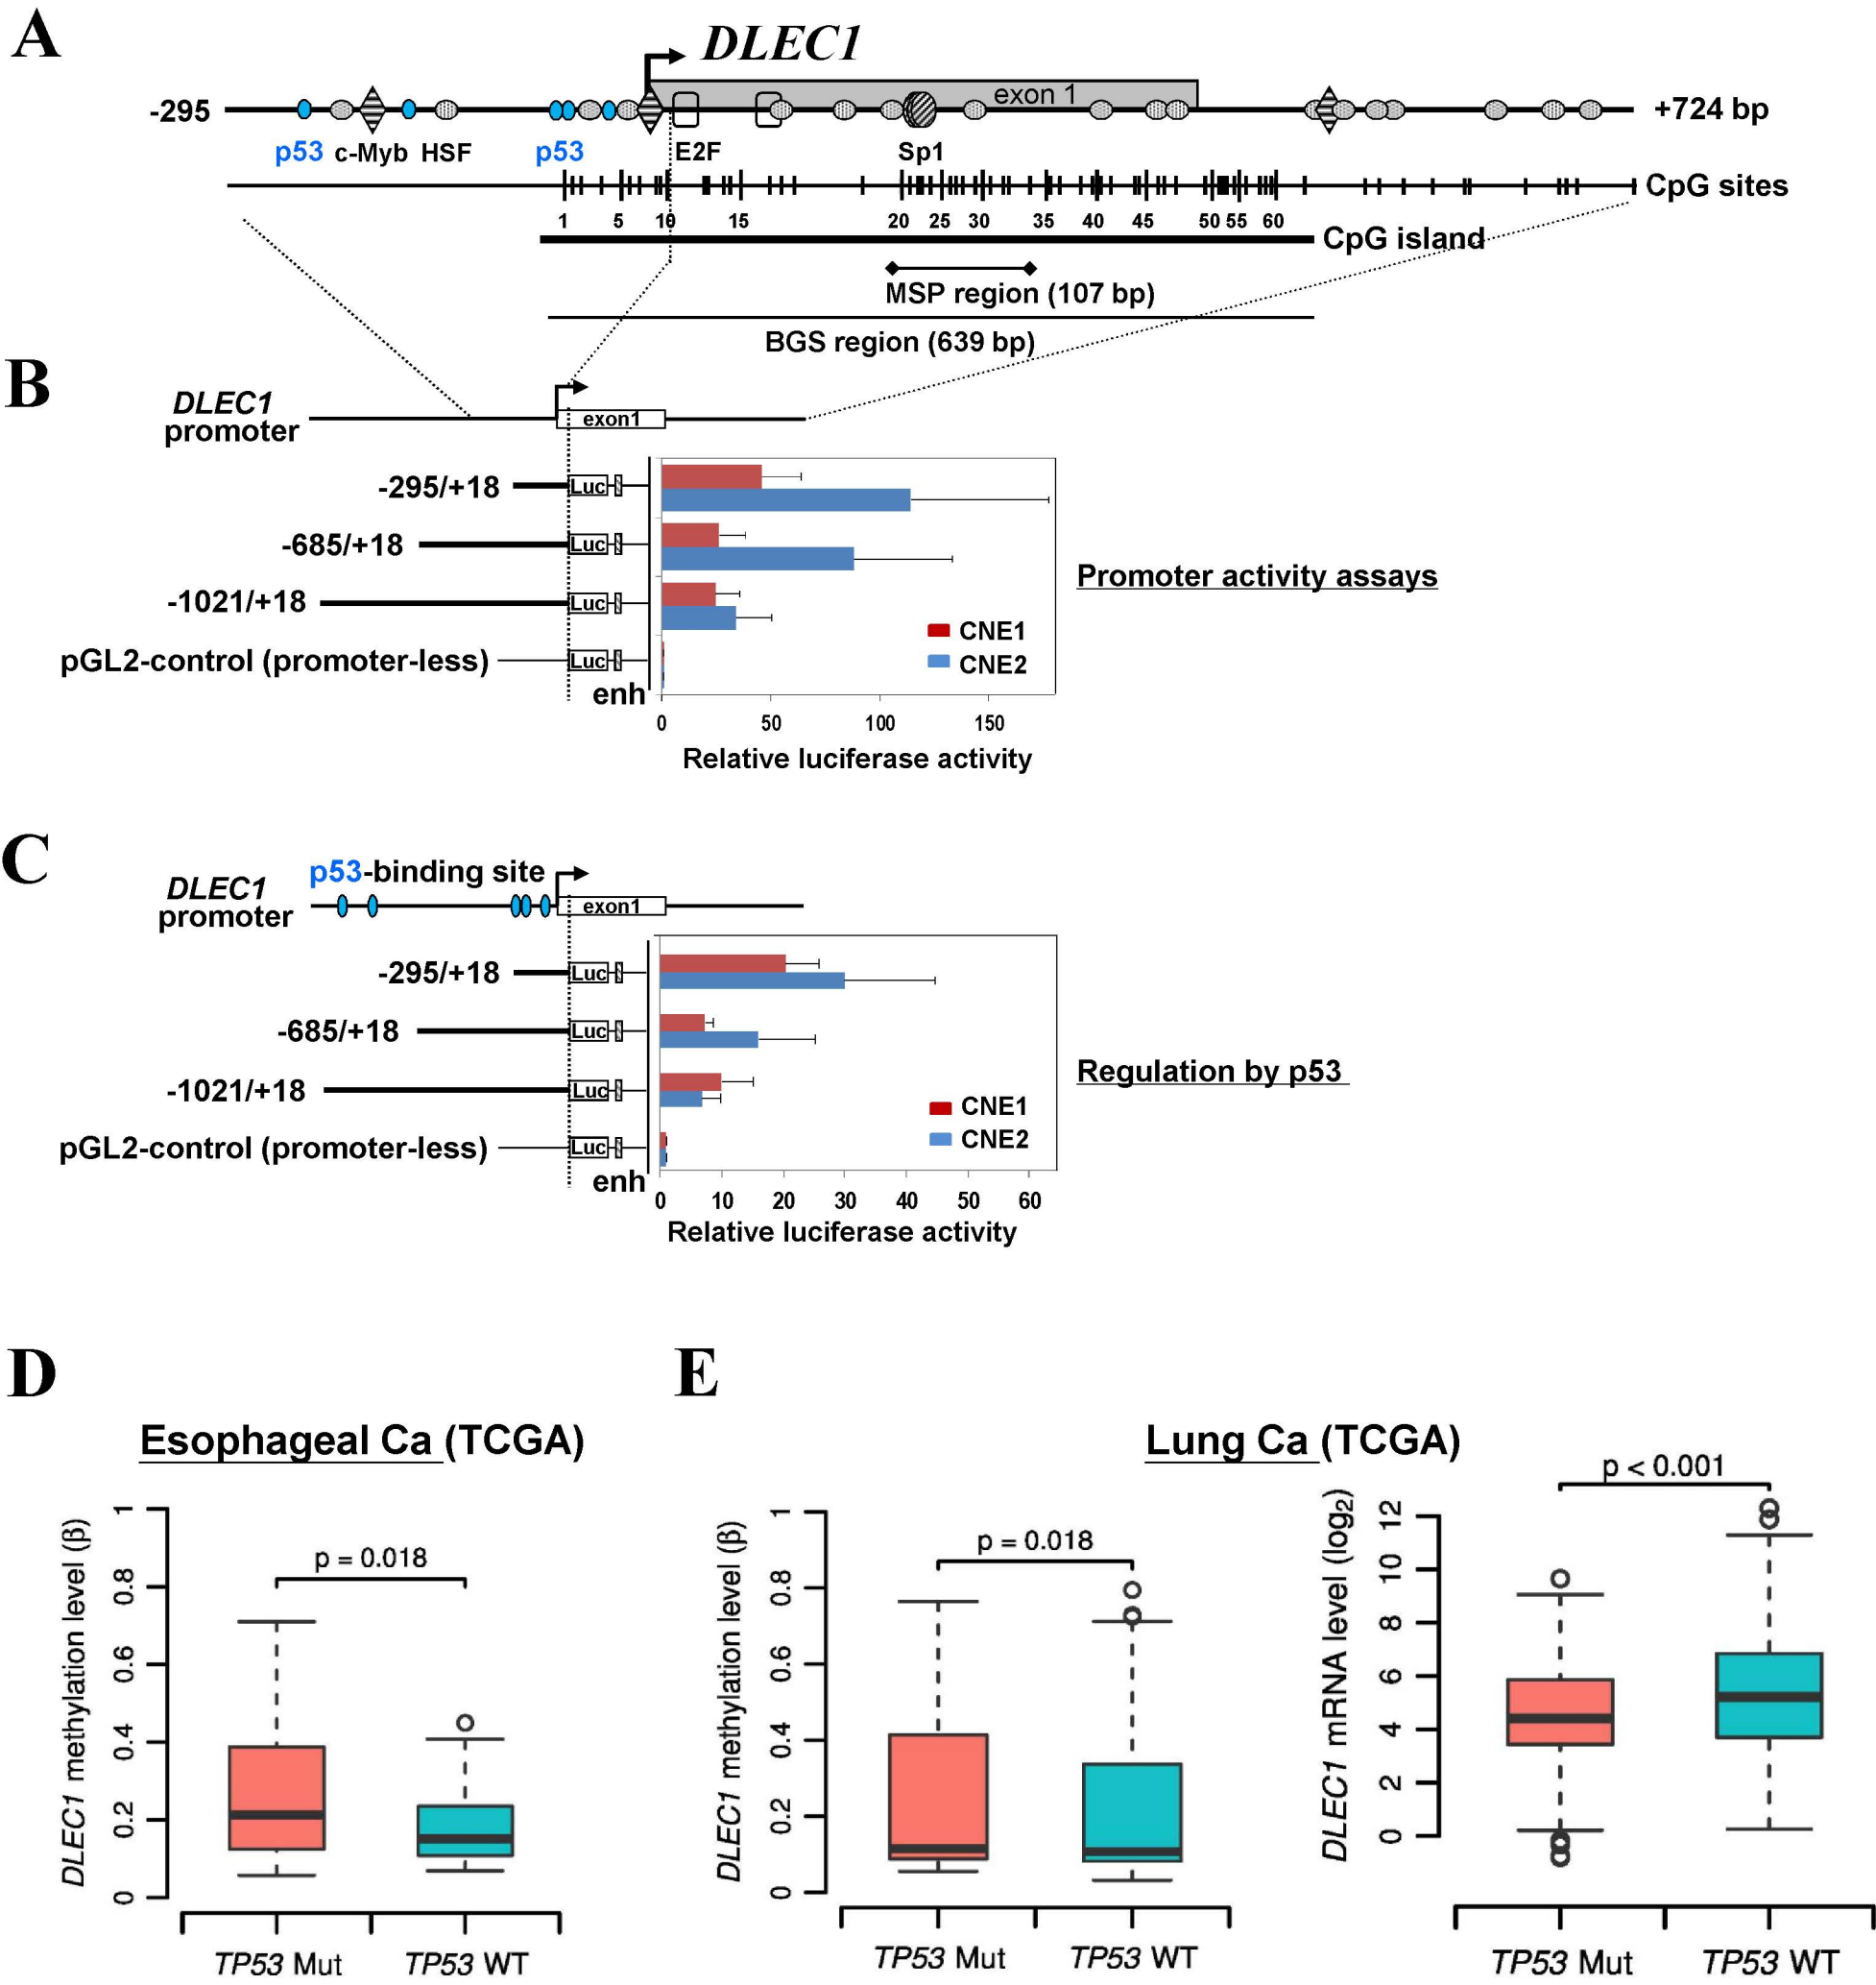

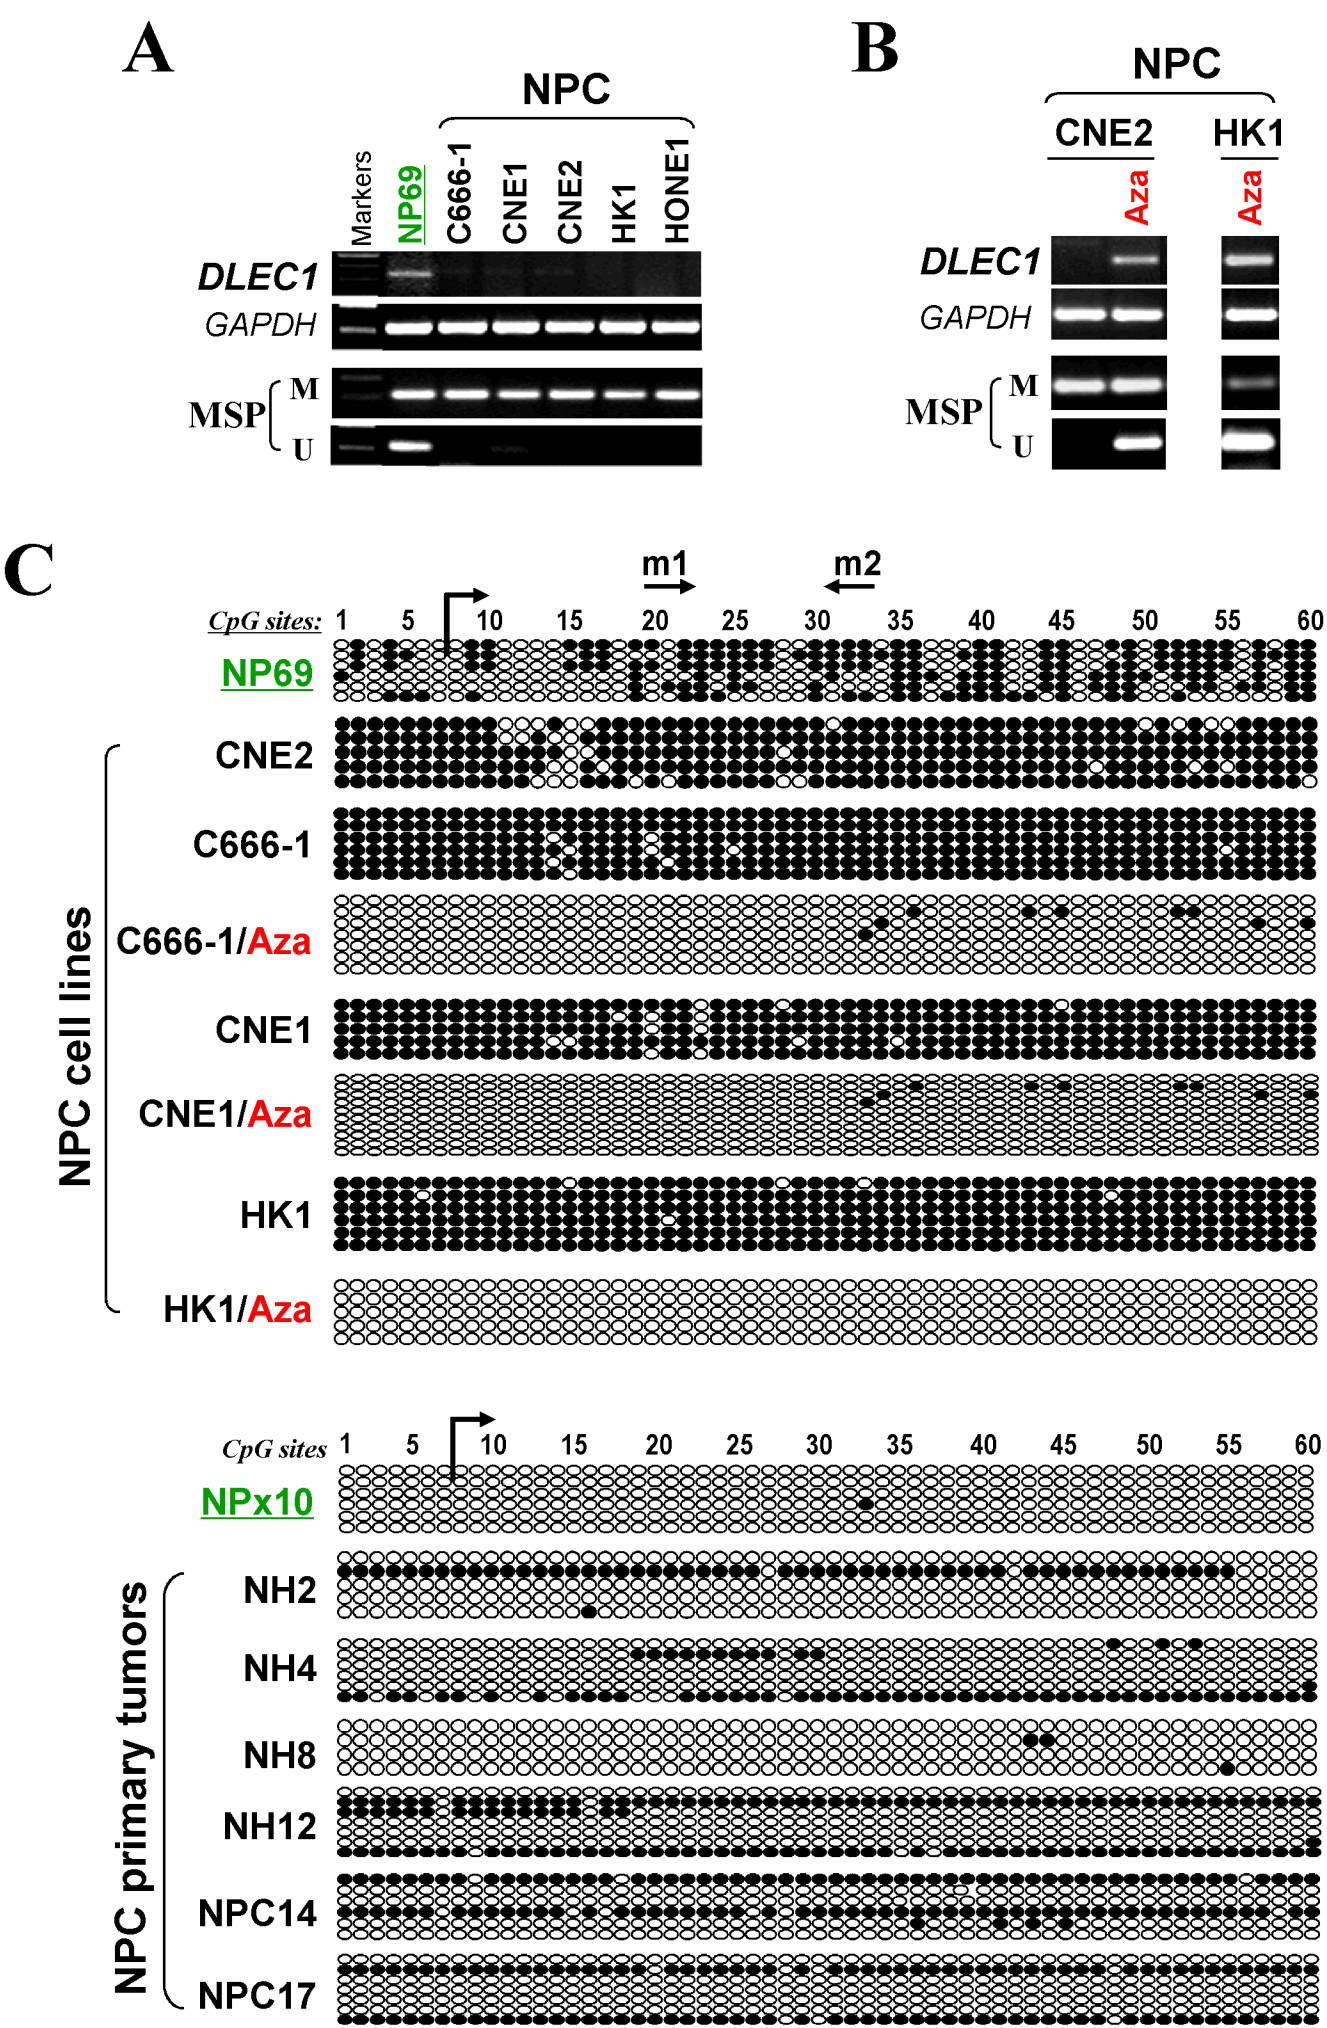

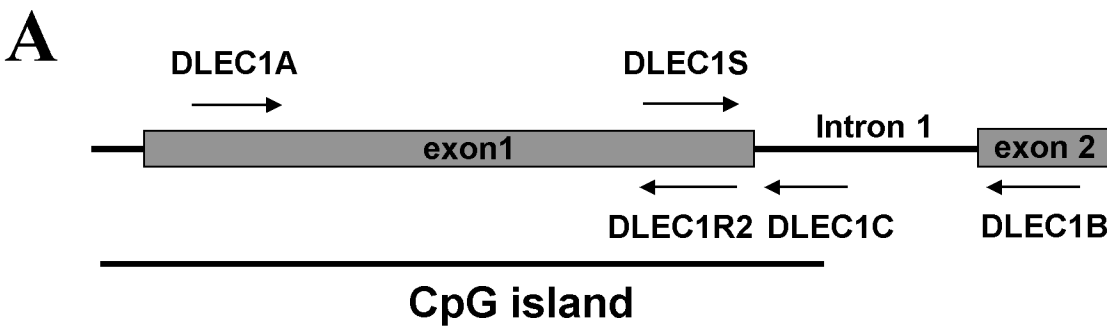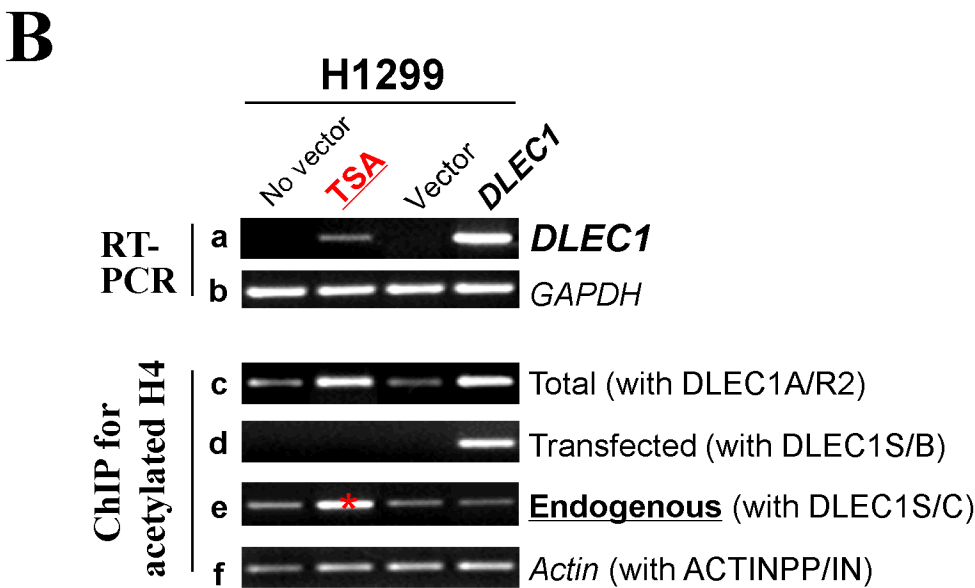

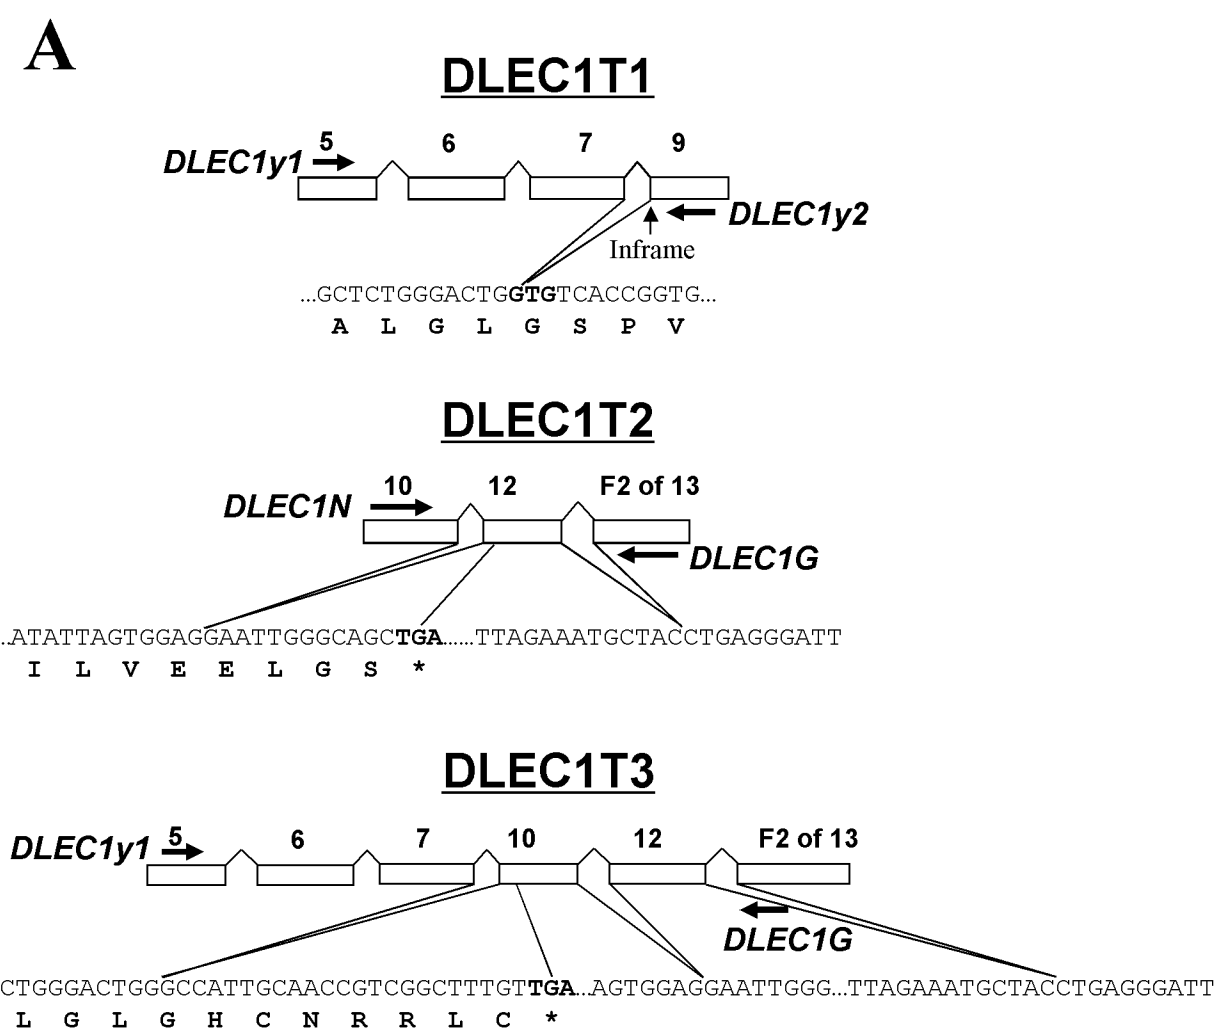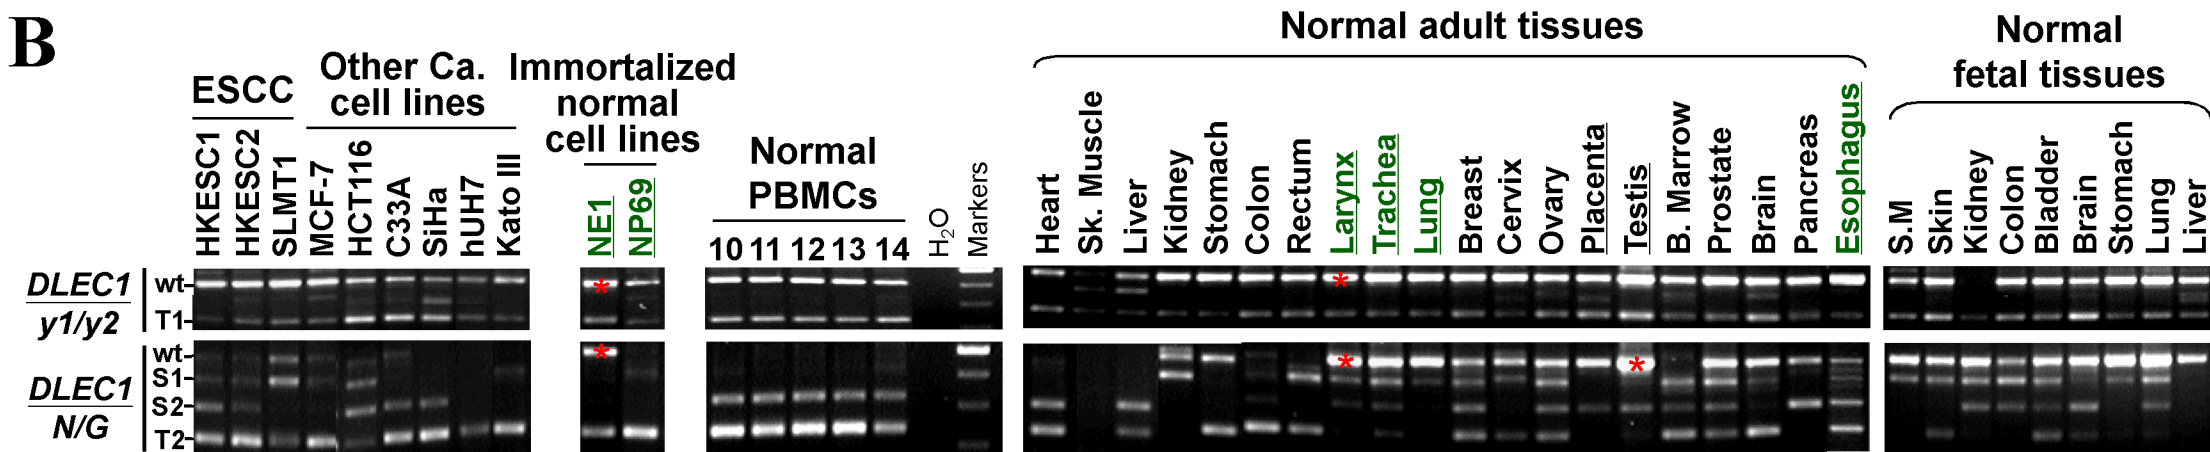

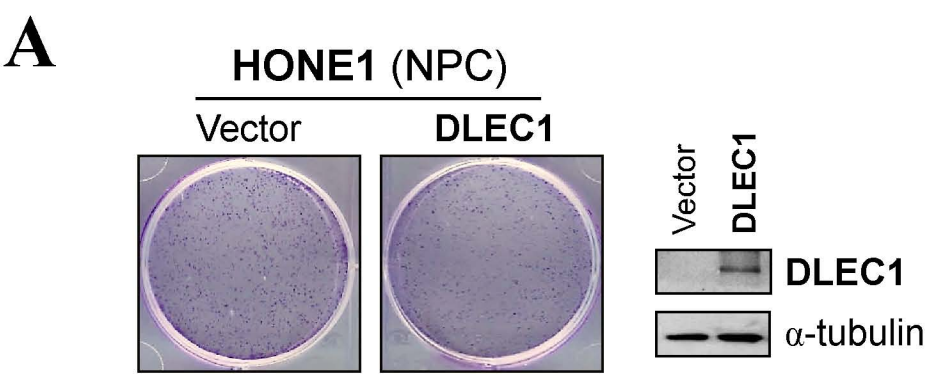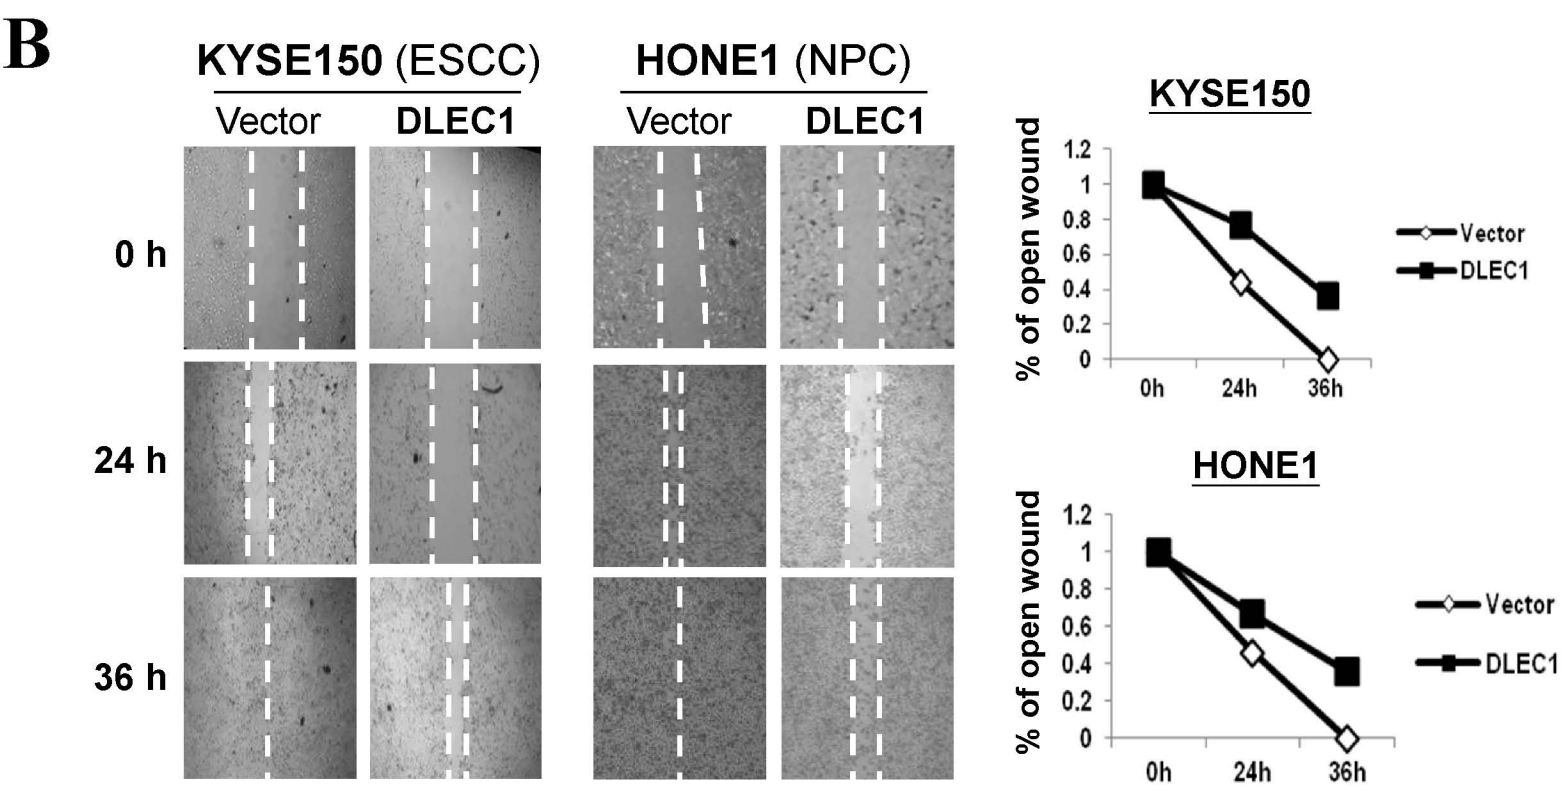

Supplement: thnov08p0061s1.pdf [file thnov08p0061s1.pdf]
